# Supplementary material
Source: publisher site journal article supplement (https://cdn.jamanetwork.com/ama/content_public/journal/oncology/936042/coi160054supp1_prod.pdf)
Supplement: Supplementary file 1 [file coi160054supp1_prod.pdf]

## Supplementary Online Content

Gierach GL, Curtis RE, Pfeiffer RM, et al. Association of adjuvant tamoxifen and aromatase inhibitor therapy with contralateral breast cancer risk among US women with breast cancer in a general community setting. *JAMA Oncol*. Published online October 6, 2016. doi:10.1001/jamaoncol.2016.3340

**eTable 1.** Select Characteristics of 7,541 Kaiser Permanente Breast Cancer Patients, by Occurrence of Second Contralateral Breast Cancer (CBC)

**eTable 2.** Association of Select Characteristics of 7,541 Kaiser Permanente Breast Cancer Patients With Ever Use of Adjuvant Tamoxifen Therapy

**eTable 3.** Multivariate Relative Risks (RR) and 95% Confidence Intervals (CI) for Contralateral Breast Cancer Associated With Adjuvant Tamoxifen Therapy of Varying Durations and Times Since Last Use

**eTable 4.** Multivariate Relative Risks (RR) and 95% Confidence Intervals (CI) for Contralateral Breast Cancer Associated With Adjuvant Tamoxifen Therapy by Age at Diagnosis of the Initial Breast Cancer

This supplementary material has been provided by the authors to give readers additional information about their work.

**eTable 1. Select Characteristics of 7,541 Kaiser Permanente Breast Cancer Patients, by Occurrence of Second Contralateral Breast Cancer (CBC)**

| Patient Characteristics                 | Case Status |              |            |              |
|-----------------------------------------|-------------|--------------|------------|--------------|
|                                         | Non-cases   |              | CBC cases  |              |
|                                         | N           | Column %*    | N          | Column %     |
| <b>Total</b>                            | <b>7293</b> | <b>100.0</b> | <b>248</b> | <b>100.0</b> |
| Kaiser Center                           |             |              |            |              |
| Colorado                                | 3197        | 43.8         | 78         | 31.5         |
| Northwest                               | 4096        | 56.2         | 170        | 68.6         |
| Year of Initial BC Diagnosis            |             |              |            |              |
| 1990-1994                               | 1066        | 14.6         | 66         | 26.6         |
| 1995-1999                               | 2092        | 28.7         | 96         | 38.7         |
| 2000-2004                               | 2228        | 30.6         | 65         | 26.2         |
| 2005-2008                               | 1907        | 26.2         | 21         | 8.5          |
| Age at Initial BC Diagnosis (years)     |             |              |            |              |
| 24-39                                   | 260         | 3.6          | 13         | 5.2          |
| 40-49                                   | 1236        | 17.0         | 40         | 16.1         |
| 50-59                                   | 2003        | 27.5         | 67         | 27.0         |
| 60-69                                   | 1991        | 27.3         | 76         | 30.7         |
| 70-79                                   | 1406        | 19.3         | 41         | 16.5         |
| 80+                                     | 397         | 5.4          | 11         | 4.4          |
| Race                                    |             |              |            |              |
| White                                   | 6777        | 92.9         | 232        | 93.6         |
| Black                                   | 194         | 2.7          | 8          | 3.2          |
| Other                                   | 322         | 4.4          | 8          | 3.2          |
| Stage of Initial BC Diagnosis           |             |              |            |              |
| I                                       | 4364        | 59.8         | 157        | 63.3         |
| II                                      | 2420        | 33.2         | 79         | 31.9         |
| III                                     | 476         | 6.5          | 12         | 4.8          |
| Unknown                                 | 33          | 0.5          | 0          | 0.0          |
| Grade of Initial BC Diagnosis           |             |              |            |              |
| Well differentiated                     | 2105        | 28.9         | 60         | 24.2         |
| Moderately differentiated               | 2675        | 36.7         | 78         | 31.5         |
| Poorly differentiated                   | 1727        | 23.7         | 54         | 21.8         |
| Undifferentiated, anaplastic            | 26          | 0.4          | 2          | 0.8          |
| Grade or differentiation not determined | 760         | 10.4         | 54         | 21.8         |

|                                                  |      |      |     |      |
|--------------------------------------------------|------|------|-----|------|
| Histology of Initial BC Diagnosis                |      |      |     |      |
| Infiltrating ductal                              | 5613 | 77.0 | 185 | 74.6 |
| Lobular                                          | 599  | 8.2  | 20  | 8.1  |
| Mixed                                            | 473  | 6.5  | 20  | 8.1  |
| All others                                       | 608  | 8.3  | 23  | 9.3  |
| Estrogen Receptor Status of Initial BC Diagnosis |      |      |     |      |
| Positive                                         | 5760 | 79.0 | 191 | 77.0 |
| Negative                                         | 1193 | 16.4 | 43  | 17.3 |
| Unknown, borderline                              | 340  | 4.7  | 14  | 5.7  |
| BC Radiotherapy for Initial Diagnosis            |      |      |     |      |
| No                                               | 2382 | 32.7 | 76  | 30.7 |
| Yes                                              | 4911 | 67.3 | 172 | 69.4 |
| BC Initial Chemotherapy with Alkylating Agents   |      |      |     |      |
| No                                               | 4852 | 66.5 | 162 | 65.3 |
| Yes                                              | 2441 | 33.5 | 86  | 34.7 |
| BC Type of Adjuvant Endocrine Therapy*           |      |      |     |      |
| No hormonal therapy                              | 2531 | 34.7 | 121 | 48.8 |
| Tamoxifen, no AI                                 | 2833 | 38.9 | 101 | 40.7 |
| AI, no tamoxifen                                 | 953  | 13.1 | 10  | 4.0  |
| Tamoxifen and AI                                 | 950  | 13.0 | 16  | 6.5  |
| Other endocrine therapy                          | 26   | 0.0  | 0   | 0.0  |
| BC Recurrence ‡                                  |      |      |     |      |
| No                                               | 6588 | 90.3 | 243 | 98.0 |
| Yes                                              | 705  | 9.7  | 5   | 2.0  |
| Years of Follow-up†                              |      |      |     |      |
| <2 yrs                                           | 1224 | 16.8 | 59  | 23.8 |
| 2-<5 yrs                                         | 2205 | 30.2 | 66  | 26.6 |
| 5-<10 yrs                                        | 2259 | 31.0 | 92  | 37.1 |
| 10-<15 yrs                                       | 1227 | 16.8 | 24  | 9.7  |
| 15+                                              | 378  | 5.2  | 7   | 2.8  |

AI, aromatase inhibitor; BC, breast cancer; CBC, contralateral breast cancer. Column percentages may not sum to 100% due to rounding.

\* Adjuvant endocrine therapy use was defined as therapy of 90 days or more during any one treatment course at any time during follow-up (entry date to exit date).

‡ BC recurrence includes regional or metastatic recurrence or type of recurrence not reported. (i.e., excludes localized recurrence only)

† Entry date (BC diagnosis plus 12 months) to exit date.

**eTable 2. Association of Select Characteristics of 7,541 Kaiser Permanente Breast Cancer Patients With Ever Use of Adjuvant Tamoxifen Therapy**

| Patient Characteristics             | Adjuvant Tamoxifen Therapy* |       |      |       | OR # | 95% CI |    |      |
|-------------------------------------|-----------------------------|-------|------|-------|------|--------|----|------|
|                                     | No                          |       | Yes  |       |      |        |    |      |
|                                     | N                           | Row % | N    | Row % |      |        |    |      |
| <b>Total</b>                        | 3641                        | 48.3  | 3900 | 51.7  |      |        |    |      |
| Kaiser Center                       |                             |       |      |       |      |        |    |      |
| Colorado                            | 1564                        | 47.8  | 1711 | 52.2  | REF  |        |    |      |
| Northwest                           | 2077                        | 48.7  | 2189 | 51.3  | 0.81 | 0.73   | to | 0.90 |
| Year of Initial BC Diagnosis        |                             |       |      |       |      |        |    |      |
| 1990-1994                           | 445                         | 39.3  | 687  | 60.7  | REF  |        |    |      |
| 1995-1999                           | 872                         | 39.9  | 1316 | 60.2  | 0.90 | 0.75   | to | 1.09 |
| 2000-2004                           | 1048                        | 45.7  | 1245 | 54.3  | 0.63 | 0.52   | to | 0.76 |
| 2005-2008                           | 1276                        | 66.2  | 652  | 33.8  | 0.22 | 0.18   | to | 0.27 |
| Age at Initial BC Diagnosis (years) |                             |       |      |       |      |        |    |      |
| 24-39                               | 150                         | 55.0  | 123  | 45.1  | REF  |        |    |      |
| 40-49                               | 529                         | 41.5  | 747  | 58.5  | 1.53 | 1.12   | to | 2.08 |
| 50-59                               | 1006                        | 48.6  | 1064 | 51.4  | 1.14 | 0.84   | to | 1.53 |
| 60-69                               | 1024                        | 49.5  | 1043 | 50.5  | 1.00 | 0.73   | to | 1.35 |
| 70-79                               | 700                         | 48.4  | 747  | 51.6  | 1.02 | 0.75   | to | 1.40 |
| 80+                                 | 232                         | 56.9  | 176  | 43.1  | 0.74 | 0.51   | to | 1.06 |
| Race                                |                             |       |      |       |      |        |    |      |
| White                               | 3314                        | 47.3  | 3695 | 52.7  | REF  |        |    |      |
| Black                               | 130                         | 64.4  | 72   | 35.6  | 0.57 | 0.41   | to | 0.80 |
| Other                               | 197                         | 59.7  | 133  | 40.3  | 0.68 | 0.53   | to | 0.87 |
| Stage of Initial BC Diagnosis       |                             |       |      |       |      |        |    |      |
| I                                   | 2294                        | 50.7  | 2227 | 49.3  | REF  |        |    |      |
| II                                  | 1071                        | 42.9  | 1428 | 57.1  | 1.64 | 1.44   | to | 1.87 |
| III                                 | 256                         | 52.5  | 232  | 47.5  | 1.38 | 1.09   | to | 1.75 |
| Unknown                             | 20                          | 60.6  | 13   | 39.4  | 0.93 | 0.41   | to | 2.11 |
| Grade of Initial BC Diagnosis       |                             |       |      |       |      |        |    |      |
| Well differentiated                 | 998                         | 46.1  | 1167 | 53.9  | REF  |        |    |      |
| Moderately differentiated           | 1146                        | 41.6  | 1607 | 58.4  | 1.21 | 1.06   | to | 1.37 |
| Poorly differentiated               | 1124                        | 63.1  | 657  | 36.9  | 0.87 | 0.74   | to | 1.03 |
| Undifferentiated, anaplastic        | 19                          | 67.9  | 9    | 32.1  | 1.11 | 0.44   | to | 2.79 |

|                                                  |      |      |      |      |      |      |    |      |
|--------------------------------------------------|------|------|------|------|------|------|----|------|
| Grade or differentiation not determined          | 354  | 43.5 | 460  | 56.5 | 1.02 | 0.83 | to | 1.26 |
| Estrogen Receptor Status of Initial BC Diagnosis |      |      |      |      |      |      |    |      |
| Positive                                         | 2352 | 39.5 | 3599 | 60.5 | REF  |      |    |      |
| Negative                                         | 1070 | 86.6 | 166  | 13.4 | 0.08 | 0.06 | to | 0.09 |
| Unknown, borderline                              | 219  | 61.9 | 135  | 38.1 | 0.32 | 0.25 | to | 0.40 |
| BC Radiotherapy for Initial Diagnosis            |      |      |      |      |      |      |    |      |
| No                                               | 1189 | 48.4 | 1269 | 51.6 | REF  |      |    |      |
| Yes                                              | 2452 | 48.2 | 2631 | 51.8 | 1.10 | 0.98 | to | 1.23 |
| BC Initial Chemotherapy with Alkylating Agents   |      |      |      |      |      |      |    |      |
| No                                               | 2378 | 47.4 | 2636 | 52.6 | REF  |      |    |      |
| Yes                                              | 1263 | 50.0 | 1264 | 50.0 | 1.22 | 1.05 | to | 1.41 |
| BC Recurrence ‡                                  |      |      |      |      |      |      |    |      |
| No                                               | 3337 | 48.9 | 3494 | 51.2 | N/A  |      |    |      |
| Yes                                              | 304  | 42.8 | 406  | 57.2 |      |      |    |      |

Abbreviations: BC, breast cancer; CI, confidence interval; OR, odds ratio.

\* Adjuvant tamoxifen therapy use was defined as therapy of 90 days or more during any one treatment course at any time during follow-up (entry date to exit date).

‡ BC recurrence includes regional or metastatic recurrence or type of recurrence not reported. (i.e., excludes localized recurrence only)

# OR (95% CI) of relation between patient characteristics and tamoxifen use was mutually adjusted for all other factors shown in this table, except BC recurrence.

**eTable 3. Multivariate\* Relative Risks (RR) and 95% Confidence Intervals (CI) for Contralateral Breast Cancer Associated With Adjuvant Tamoxifen Therapy of Varying Durations and Times Since Last Use**

| <b>Time since last tamoxifen use and duration of therapy</b> | <b>No. CBC</b> | <b>Person-years</b> | <b>RR</b>   | <b>95% CI</b>       |
|--------------------------------------------------------------|----------------|---------------------|-------------|---------------------|
| Never used or used for <90 days                              | 131            | 20760               | REF         |                     |
| Current user                                                 |                |                     |             |                     |
| Duration 90 days-<1 year                                     | 6              | 1717                | 0.71        | 0.26 to 1.70        |
| Duration 1-<4 years                                          | 24             | 8053                | <b>0.49</b> | <b>0.29 to 0.82</b> |
| Duration 4+ years                                            | 3              | 1429                | <b>0.26</b> | <b>0.06 to 0.76</b> |
| Former user, 30days-<3y since last use                       |                |                     |             |                     |
| Duration 90 days-<1 year                                     | 6              | 1175                | 0.94        | 0.35 to 2.13        |
| Duration 1-<4 years                                          | 12             | 2949                | 0.54        | 0.26 to 1.03        |
| Duration 4+ years                                            | 14             | 3427                | <b>0.42</b> | <b>0.21 to 0.78</b> |
| Former user, 3-<5y since last use                            |                |                     |             |                     |
| Duration 90 days-<1 year                                     | 6              | 481                 | 2.14        | 0.79 to 4.83        |
| Duration 1-<4 years                                          | 13             | 1252                | 1.04        | 0.51 to 1.98        |
| Duration 4+ years                                            | 6              | 1653                | <b>0.23</b> | <b>0.08 to 0.55</b> |
| Former user, 5+y since last use                              |                |                     |             |                     |
| Duration 90 days-<1 year                                     | 6              | 897                 | 0.61        | 0.23 to 1.37        |
| Duration 1-<4 years                                          | 12             | 2043                | 0.62        | 0.29 to 1.22        |
| Duration 4+ years                                            | 9              | 2138                | 0.49        | 0.20 to 1.08        |

CI, confidence interval; CBC, contralateral breast cancer; REF, referent group; RR, relative risk.

\* Poisson models were stratified by study site (NW/CO), age at diagnosis (<40, 40-49, 50- 59, 60-69, 70+ years), stage at diagnosis (I, II, III, unknown stage), ER status of the initial tumor (positive, negative, unknown/indeterminate), time since initial breast cancer in yearly categories and 15+ years, and year of diagnosis (1990-94, 1995-99, 2000-04, 2005-2008). We simultaneously adjusted for aromatase inhibitor use (with or without tamoxifen), chemotherapy with an alkylating agent, and radiotherapy

**eTable 4. Multivariate\* Relative Risks (RR) and 95% Confidence Intervals (CI) for Contralateral Breast Cancer Associated With Adjuvant Tamoxifen Therapy by Age at Diagnosis of the Initial Breast Cancer**

| Treatment                                                       | < 50 years old at initial BC diagnosis |              |           |              | 50+ years old at initial BC diagnosis |              |             |                     |
|-----------------------------------------------------------------|----------------------------------------|--------------|-----------|--------------|---------------------------------------|--------------|-------------|---------------------|
|                                                                 | No. CBC                                | Person-years | RR/y use† | 95% CI       | No. CBC                               | Person-years | RR/y use†   | 95% CI              |
| Tamoxifen duration (years, continuous) and time since last use: |                                        |              |           |              |                                       |              |             |                     |
| Never used or used for <90 days                                 | 28                                     | 4255         | REF       |              | 103                                   | 16505        | REF         |                     |
| Current user                                                    | 8                                      | 2423         | 0.79      | 0.47 to 1.18 | 25                                    | 8776         | <b>0.76</b> | <b>0.64 to 0.90</b> |
| Former user, 30days-<3y since last use                          | 5                                      | 1570         | 0.83      | 0.55 to 1.15 | 27                                    | 5981         | <b>0.84</b> | <b>0.74 to 0.96</b> |
| Former use, 3-<5y since last use                                | 5                                      | 630          | 0.74      | 0.51 to 1.02 | 20                                    | 2756         | 0.91        | 0.77 to 1.06        |
| Former user, 5+y since last use                                 | 7                                      | 1048         | 0.98      | 0.68 to 1.35 | 20                                    | 4030         | <b>0.82</b> | <b>0.67 to 0.98</b> |

BC, breast cancer; CI, confidence interval; CBC, contralateral breast cancer; REF, referent group; RR, relative risk.

\* Poisson models were stratified by study site (NW/CO), age at diagnosis (<40, 40-49, 50-59, 60-69, 70+ years), stage at diagnosis (I, II, III, unknown stage), ER status of the initial tumor (positive, negative, unknown/indeterminate), time since initial breast cancer in yearly categories and 15+ years, and year of diagnosis (1990-94, 1995-99, 2000-04, 2005-2008). We simultaneously adjusted for aromatase inhibitor use (with or without tamoxifen), chemotherapy with an alkylating agent, and radiotherapy.

† RRs from tamoxifen duration trend analyses are estimates of risk per year of tamoxifen use.
